# Supplementary material for: Further Evidence for in Utero Transmission of Equine Hepacivirus to Foals
Source: MDPI journal article supplement (doi:10.3390/v11121124), 2019-12-05
Supplement: s1 [file s1]

| strain                      | sample type    | Year | Country     | GenBank accession number    |          |          | Reference              |
|-----------------------------|----------------|------|-------------|-----------------------------|----------|----------|------------------------|
|                             |                |      |             | 5'UTR                       | NS3      | NS5B     |                        |
| FR-Eq73_Liver-Lung/FR/2013  | liver+lung     | 2013 | France      | KT175038                    | MN229474 | MN229481 | Pronost et al, 2016    |
| FR-Eq69_Liver-Lung/FR/2014  | liver+lung     | 2014 | France      | KT175035                    | MN229472 | MN229478 | Pronost et al, 2016    |
| FR-Eq69_allanto/FR/2014     | allantochorion | 2014 | France      | KT175034                    | no amp   | MN229477 | Pronost et al, 2016    |
| FR-Eq70_allanto/FR/2015     | allantochorion | 2015 | France      | KT175036                    | no amp   | MN229479 | Pronost et al, 2016    |
| FR-Eq01_Serum/FR/2013       | serum          | 2013 | France      | KT175006                    | KX239350 | KX239410 | Pronost et al, 2016    |
| FR-Eq02_Serum/FR/2013       | serum          | 2013 | France      | KT175007                    | KX239351 | KX239411 | Pronost et al, 2016    |
| FR-Eq09_Serum/FR/2013       | serum          | 2013 | France      | KT175011                    | KX239357 | KX239415 | Pronost et al, 2016    |
| FR-Eq11_Serum/FR/2013       | serum          | 2013 | France      | KT175012                    | KX239358 | KX239416 | Pronost et al, 2016    |
| FR-Eq21_Serum/FR/2013       | serum          | 2013 | France      | KT175015                    | KX239365 | KX239423 | Pronost et al, 2016    |
| FR-Eq22_Serum/FR/2013       | serum          | 2013 | France      | KT175016                    | KX239366 | KX239424 | Pronost et al, 2016    |
| FR-Eq25_Serum/FR/2013       | serum          | 2013 | France      | KT175017                    | KX239369 | KX239425 | Pronost et al, 2016    |
| FR-Eq33_Serum/FR/2014       | serum          | 2014 | France      | KT175018                    | KX239376 | KX239433 | Pronost et al, 2016    |
| FR-Eq35_Serum/FR/2014       | serum          | 2014 | France      | KT175019                    | KX239378 | KX239435 | Pronost et al, 2016    |
| FR-Eq38_Serum/FR/2014       | serum          | 2014 | France      | KT175022                    | KX239380 | KX239437 | Pronost et al, 2016    |
| FR-Eq45_Serum/FR/2014       | serum          | 2014 | France      | KT175023                    | KX239387 | KX239444 | Pronost et al, 2016    |
| FR-Eq47_Serum/FR/2014       | serum          | 2014 | France      | KT175024                    | KX239389 | KX239446 | Pronost et al, 2016    |
| FR-Eq49_Serum/FR/2014       | serum          | 2014 | France      | KT175025                    | KX239391 | KX239448 | Pronost et al, 2016    |
| FR-Eq50_Serum/FR/2014       | serum          | 2014 | France      | KT175026                    | KX239392 | KX239449 | Pronost et al, 2016    |
| FR-Eq53_Serum/FR/2014       | serum          | 2014 | France      | KT175027                    | KX239395 | KX239452 | Pronost et al, 2016    |
| FR-Eq62_Serum/FR/2014       | serum          | 2014 | France      | KT175028                    | KX239402 | KX239459 | Pronost et al, 2016    |
| FR-Eq63_Serum/FR/2014       | serum          | 2014 | France      | KT175029                    | KX239403 | KX239460 | Pronost et al, 2016    |
| FR-Eq65_Serum/FR/2014       | serum          | 2014 | France      | KT175030                    | KX239405 | KX239462 | Pronost et al, 2016    |
| FR-Eq15_Serum/FR/2013       | serum          | 2015 | France      | KT175014                    | KX239362 | KX239420 | Pronost et al, 2016    |
| FR-Eq72_Serum/FR/2015       | serum          | 2015 | France      | KT175037                    | MN229473 | MN229480 | Pronost et al, 2016    |
| FR-Eq74_Serum/FR/2015       | serum          | 2015 | France      | KT175039                    | MN229475 | MN229482 | Pronost et al, 2016    |
| FR-Eq84_Serum/FR/2015       | serum          | 2015 | France      | MN229470                    | MN229476 | MN229483 | this paper             |
| FR-Eq85_Serum/FR/2015       | serum          | 2015 | France      | MN229471                    | no amp   | MN229484 | this paper             |
| NPHV_EF317_98/Scotland/1998 | serum          | 1998 | Scotland    | JX948117                    | JX948118 | JX948119 | Lyons et al, 2012      |
| DH1/HUN/2013                | serum          | 2013 | Hungary     | KF177391, polyprotein gene  |          |          | Reuter et 2014         |
| AK2012_NPHV-NZP-1/US/2011   | serum          | 2011 | USA         | JQ434001, polyprotein gene  |          |          | Burbelo et al, 2012    |
| AK2012_NPHV-G1-073/US/2011  | serum          | 2011 | USA         | JQ434002, polyprotein gene  |          |          | Burbelo et al, 2012    |
| AK2012_NPHV-A6-006/US/2011  | serum          | 2011 | USA         | JQ434003, polyprotein gene  |          |          | Burbelo et al, 2012    |
| AK2012_NPHV-B10-022/US/2011 | serum          | 2011 | USA         | JQ434004, polyprotein gene  |          |          | Burbelo et al, 2012    |
| AK2012_NPHV-F8-06/US/2011   | serum          | 2011 | USA         | JQ434005, polyprotein gene  |          |          | Burbelo et al, 2012    |
| AK2012_NPHV-G5-077/US/2011  | serum          | 2011 | USA         | JQ434006, polyprotein gene  |          |          | Burbelo et al, 2012    |
| AK2012_NPHV-H10-094/US/2011 | serum          | 2011 | USA         | JQ434007, polyprotein gene  |          |          | Burbelo et al, 2012    |
| AK2012_NPHV-H3-011/US/2011  | serum          | 2011 | USA         | JQ434008, polyprotein gene  |          |          | Burbelo et al, 2012    |
| NZP1                        | serum          | 2011 | USA         | KP325401, complete genome   |          |          | Scheel et al, 2015     |
| Canine-AAK2011/US/2011      | serum          | 2011 | USA         | JF744991, polyprotein gene  |          |          | Kapoor et al, 2011     |
| WSU-2013/US/2013            | serum          | 2013 | USA         | KJ472766, polyprotein gene  |          |          | Evanoff submitted      |
| H4B2                        | serum          | 2013 | Brazil      | KT203940                    | /        | KT006300 | Figueiredo et al, 2015 |
| H9C2                        | serum          | 2012 | Brazil      | KT203935                    | /        | KT006295 | Figueiredo et al, 2015 |
| H2A20                       | serum          | 2009 | Brazil      | KT203933                    | /        | KT006293 | Figueiredo et al, 2015 |
| H8B10                       | serum          | 2011 | Brazil      | KT203939                    | /        | KT006299 | Figueiredo et al, 2015 |
| H3A24                       | serum          | 2009 | Brazil      | KT203934                    | /        | KT006294 | Figueiredo et al, 2015 |
| 1040/16-14565FG             | serum          | 2016 | Italia      | KY695184                    | KY695202 | KY695220 | Elia et al, 2017       |
| WZC-8/HK/China              | serum          | 2014 | China       | KU747003                    | KU746997 | KU746991 | Lu et al, 2016         |
| HD19/HZ/China               | serum          | 2015 | China       | KU747006                    | KU747000 | KU746994 | Lu 2016                |
| JPN3/JP/2013_(NC_024889)    | serum          | 2013 | Japan       | NC_024889, polyprotein gene |          |          | Baechlein et al, 2015  |
| K-061                       | serum          | 2015 | South Korea | KX056116, polyprotein gene  |          |          | Kim, unsubmitted       |
| K-062                       | serum          | 2015 | South Korea | KX056117, polyprotein gene  |          |          | Kim, unsubmitted       |
