# Supplementary figures and images for: Further Evidence for in Utero Transmission of Equine Hepacivirus to Foals
Source: MDPI journal article supplement (doi:10.3390/v11121124), 2019-12-05

Subtype 1

Case #3

Case #2

Case #1

Subtype 2

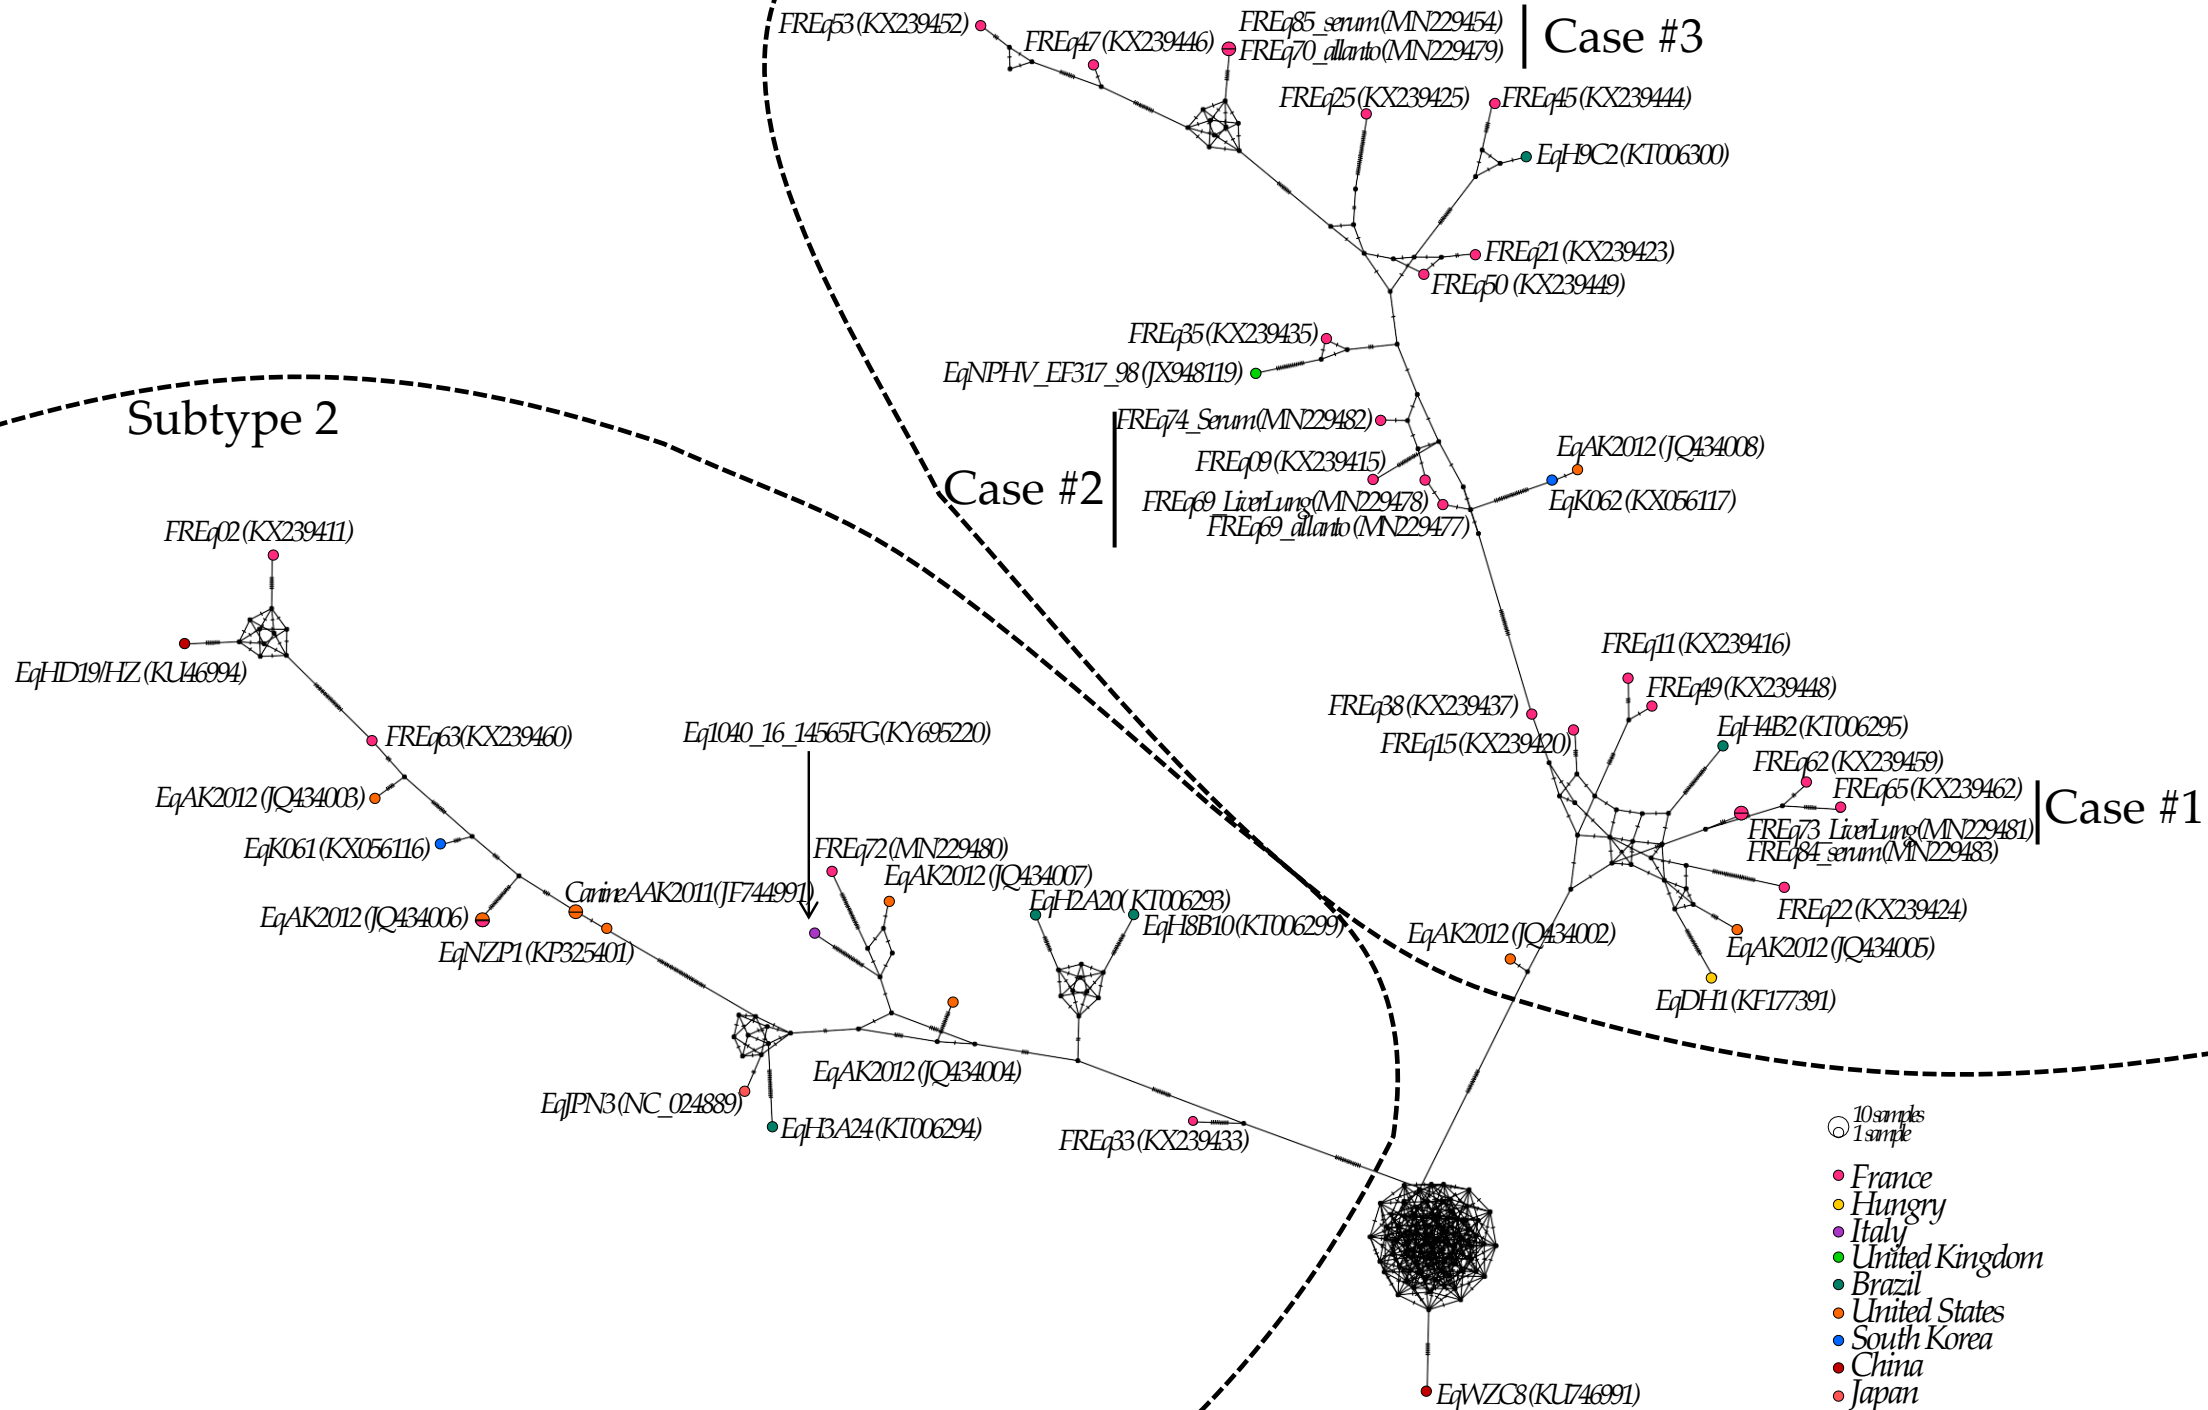

Supplement: s1 [file s1]
